# Supplementary material for: A subnanomolar fluorescent probe for protein kinase CK2 interaction studies
Source: Royal Society of Chemistry journal article supplement (doi:10.1039/c2ob26022k), 2012-01-01

## Supplementary information

# A subnanomolar fluorescent probe for protein kinase CK2 interaction studies

Erki Enkvist,<sup>a</sup> Kaido Viht,<sup>a</sup> Nils Bischoff,<sup>b</sup> Jürgen Vahter,<sup>a</sup> Siiri Saaver,<sup>a</sup> Gerda Raidaru,<sup>a</sup> Olaf-Georg Issinger,<sup>c</sup> Karsten Niefind,<sup>b</sup> and Asko Uri\*<sup>a</sup>

<sup>a</sup> *Institute of Chemistry, University of Tartu, 14A Ravila St., 50411 Tartu, Estonia. Tel: +372 7375275; E-mail: asko.uri@ut.ee*

<sup>b</sup> *Department für Chemie, Institut für Biochemie, Universität zu Köln, Otto-Fischer-Str. 12-14, D-50674 Köln, Germany.*

<sup>c</sup> *Institut for Biokemi og Molekylær Biologi, Syddansk Universitet, Campusvej 55, DK-5230 Odense, Denmark.*

## Contents

- a) HPLC-MS data.
- b) Selectivity table
- c) X-ray diffraction data and refinement statistics
- d) UV and NMR spectra

## HPLC-MS data

### HPLC retention times and purity of the compounds.

Purification of the compounds was performed with Schimadzu LC Solution (Prominence) system by using manual injector and a diode array (SPD M20A) detector. Separation was achieved with a Gemini C18 5  $\mu$  column (250 $\times$ 4.6 mm i.d Phenomenex) protected by a 5  $\mu$  Gemini C18 4 $\times$ 2.0 mm guard column. Mobile phase A: 0.1 % TFA, mobile phase B: 0.1% TFA in ACN and a flow of 1 ml/min were employed. Linear gradient elution was started at 3 min (injection time was also at 3 min) with 10% to 30% B. The speed of the gradient is specified in the table.

**Table S1**

| Code, structure, molecular formula, exact monoisotopic mass and MW. Letters L or D note configurations of amino acids.                                                                                                                                                                 | Gradient         | R <sub>t</sub> , min | Purity | ESI-MS |
|----------------------------------------------------------------------------------------------------------------------------------------------------------------------------------------------------------------------------------------------------------------------------------------|------------------|----------------------|--------|--------|
| <p><b>ARC-1154</b></p> 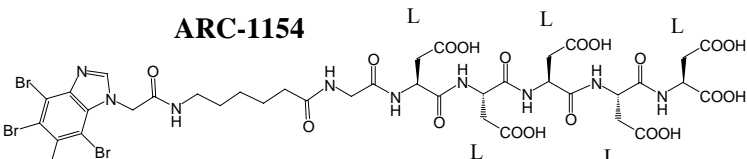 <p>C<sub>37</sub>H<sub>43</sub>Br<sub>4</sub>N<sub>9</sub>O<sub>19</sub><br/>                     Exact Mass: 1232,94087<br/>                     Mol. Wt.: 1237,40258</p>    | 15%B-90%B/30min  | 13.5                 | 100%   | 1238   |
| <p><b>ARC-1155</b></p>  <p>C<sub>41</sub>H<sub>51</sub>Br<sub>4</sub>N<sub>9</sub>O<sub>19</sub><br/>                     Exact Mass: 1289,00347<br/>                     Mol. Wt.: 1293,50890</p>  | 30%B-90%B/30 min | 8.6                  | 95.7%. | 1294   |
| <p><b>ARC-1183</b></p>  <p>C<sub>39</sub>H<sub>45</sub>Br<sub>4</sub>N<sub>9</sub>O<sub>21</sub><br/>                     Exact Mass: 1290,94635<br/>                     Mol. Wt.: 1295,43866</p>  | 10%B-90%B/30 min | 13.7                 | 100,0% | 1296   |
| <p><b>ARC-1502</b></p>  <p>C<sub>45</sub>H<sub>58</sub>Br<sub>4</sub>N<sub>10</sub>O<sub>21</sub><br/>                     Exact Mass: 1390,05115<br/>                     Mol. Wt.: 1394,61282</p> | 15%B-90%B/30 min | 14.5                 | 100%   | 1395   |

|                                                                                                                                                                                                                                                                   |                 |      |        |                          |
|-------------------------------------------------------------------------------------------------------------------------------------------------------------------------------------------------------------------------------------------------------------------|-----------------|------|--------|--------------------------|
| <p><b>ARC-1504</b></p> <p><math>C_{77}H_{94}Br_4N_{12}O_{28}S_2</math><br/>                     Exact Mass: 2014,24754<br/>                     Mol. Wt.: 2019,38234</p> 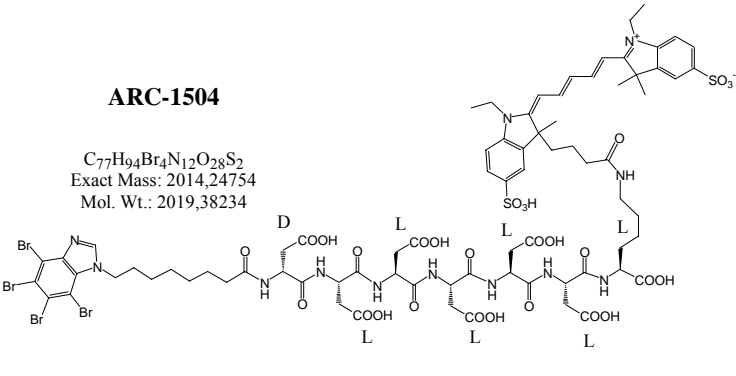        | 30%B-60%B/30min | 18.0 | 100%   | $[M+H]^{2+}$<br><br>1010 |
| <p><b>5-Tamra-RADDSDDDD</b></p> <p><math>C_{65}H_{79}N_{15}O_{30}</math><br/>                     Exact Mass: 1549,51173<br/>                     Mol. Wt.: 1550,40586</p>       | 10%B-60%B/30min | 12.8 | 100,0% | $[M+H]^{2+}$<br><br>776  |
| <p><b>5-Tamra-RADDS(p)DDDD</b></p> <p><math>C_{65}H_{80}N_{15}O_{33}P</math><br/>                     Exact Mass: 1629,47807<br/>                     Mol. Wt.: 1630,38576</p>  | 10%B-60%B/30min | 13.5 |        | $[M+H]^{2+}$<br><br>816  |

## HRMS spectra and HPLC chromatograms

### ARC-1154

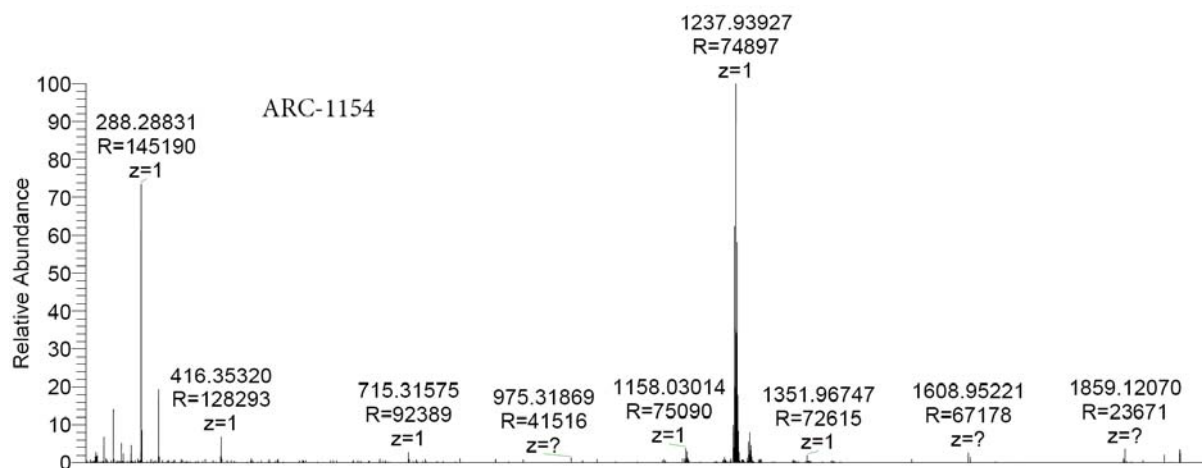

ARC-1154  
TBBi-Ac-Ahx-Gly Asp5  
Gradient 15-90/30 min  
Rt 13.6 min  
Purity 100%

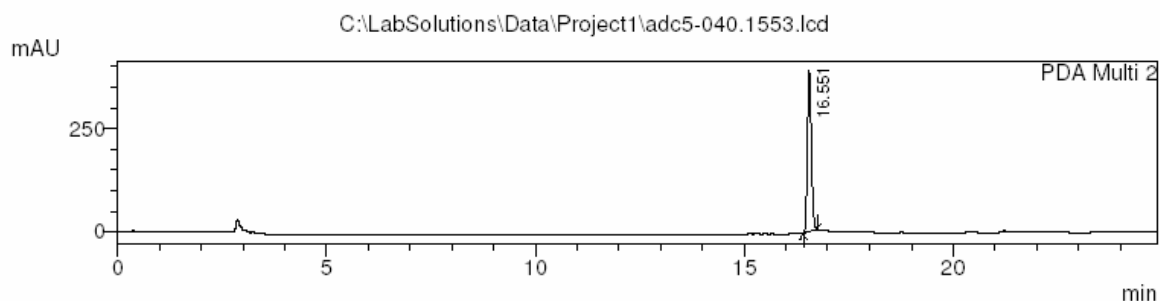

1 PDA Multi 2/260nm 4nm

PeakTable

PDA Ch2 260nm 4nm

| Peak# | Ret. Time | Area    | Height | Area %  | Height % |
|-------|-----------|---------|--------|---------|----------|
| 1     | 16.551    | 2470348 | 391481 | 100.000 | 100.000  |
| Total |           | 2470348 | 391481 | 100.000 | 100.000  |

## ARC-1155

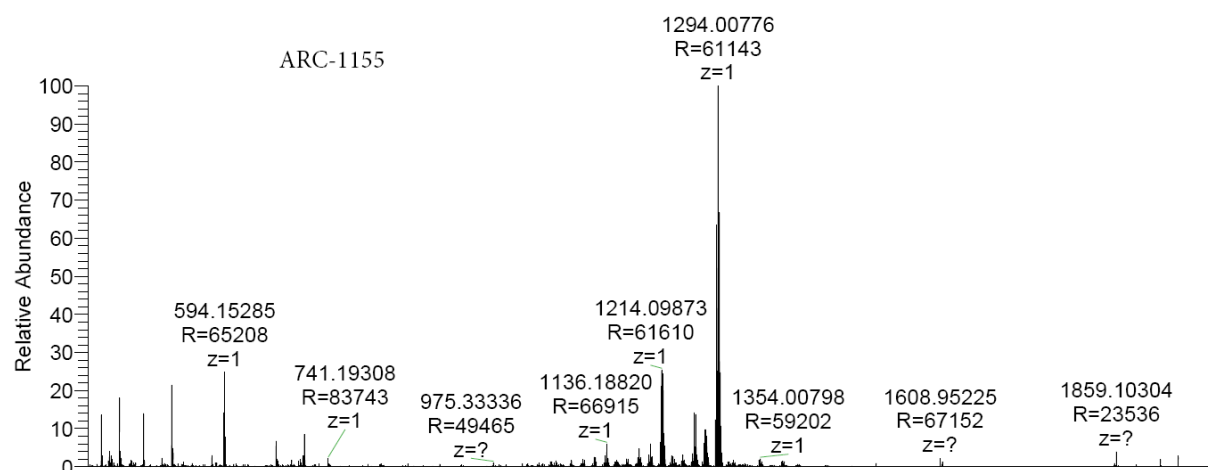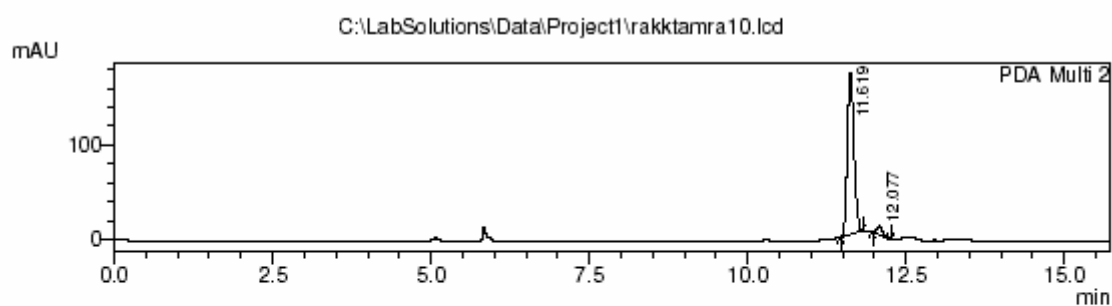

1 PDA Multi 2/260nm 4nm

PeakTable

PDA Ch2 260nm 4nm

| Peak# | Ret. Time | Area    | Height | Area %  | Height % |
|-------|-----------|---------|--------|---------|----------|
| 1     | 11.619    | 1224807 | 171916 | 95.726  | 95.109   |
| 2     | 12.077    | 54682   | 8841   | 4.274   | 4.891    |
| Total |           | 1279489 | 180757 | 100.000 | 100.000  |

### ARC-1183

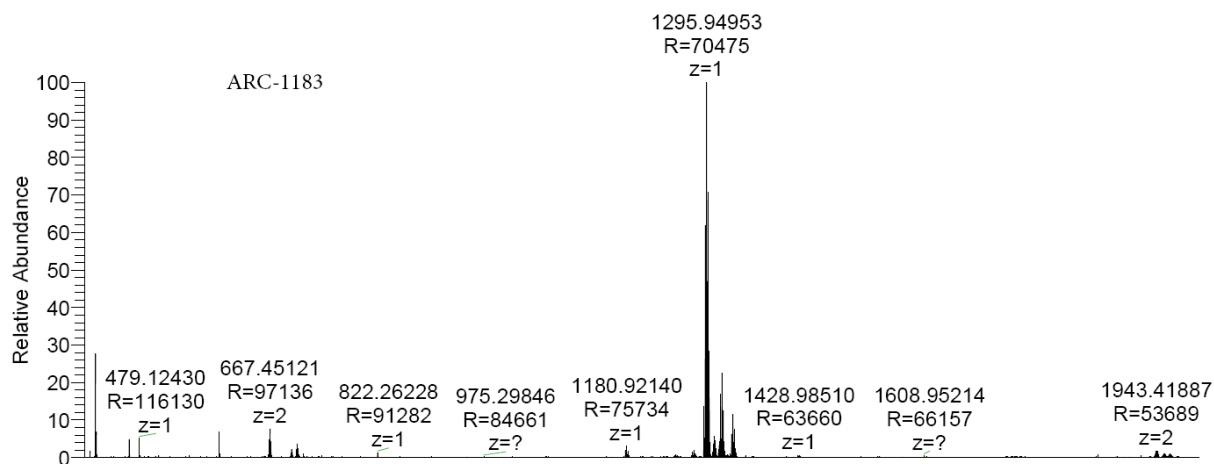

ARC 1183  
 TBBI-Ac-Ahx-dAsp-Asp5  
 Gradient 10-50/30 min  
 Rt 13.7 min  
 Purity 100%

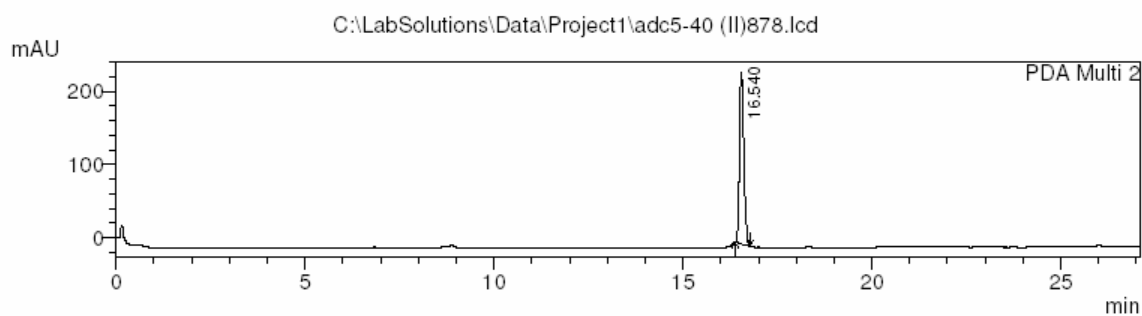

1 PDA Multi 2/260nm 4nm

PeakTable

PDA Ch2 260nm 4nm

| Peak# | Ret. Time | Area    | Height | Area %  | Height % |
|-------|-----------|---------|--------|---------|----------|
| 1     | 16.540    | 1865736 | 234930 | 100.000 | 100.000  |
| Total |           | 1865736 | 234930 | 100.000 | 100.000  |

## ARC-1502

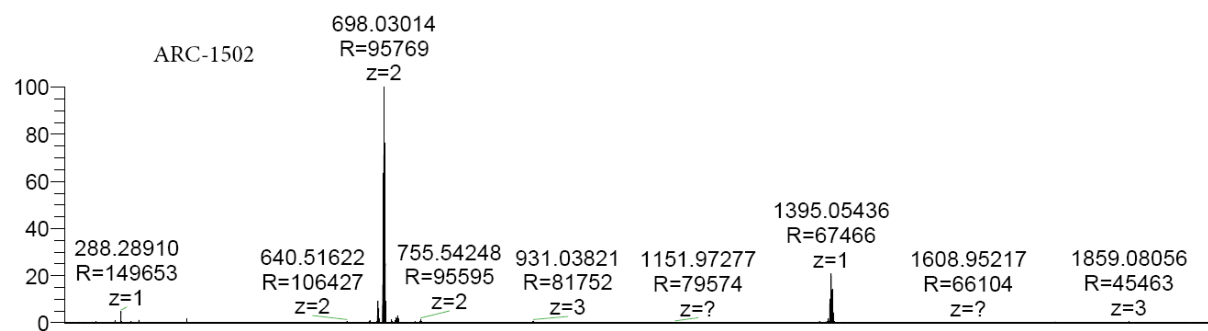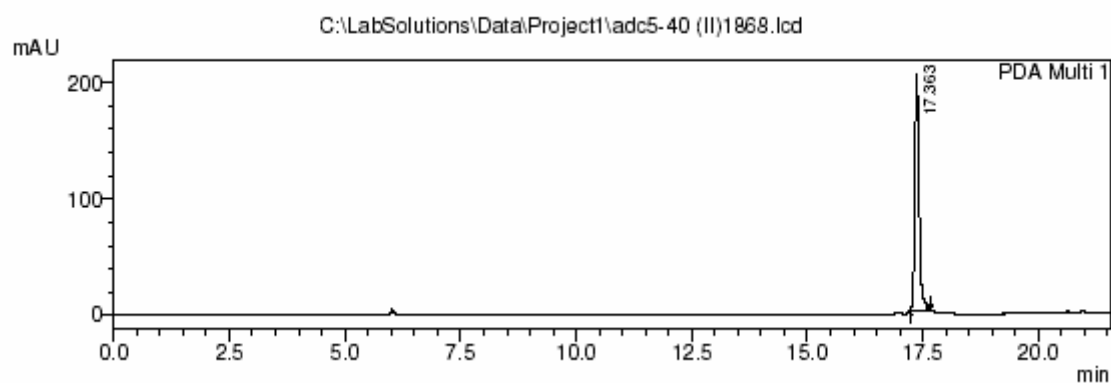

PeakTable

PDA Ch1 260nm 4nm

| Peak# | Ret. Time | Area    | Height | Area %  | Height % |
|-------|-----------|---------|--------|---------|----------|
| 1     | 17.363    | 1294233 | 203635 | 100.000 | 100.000  |
| Total |           | 1294233 | 203635 | 100.000 | 100.000  |

### ARC-1504

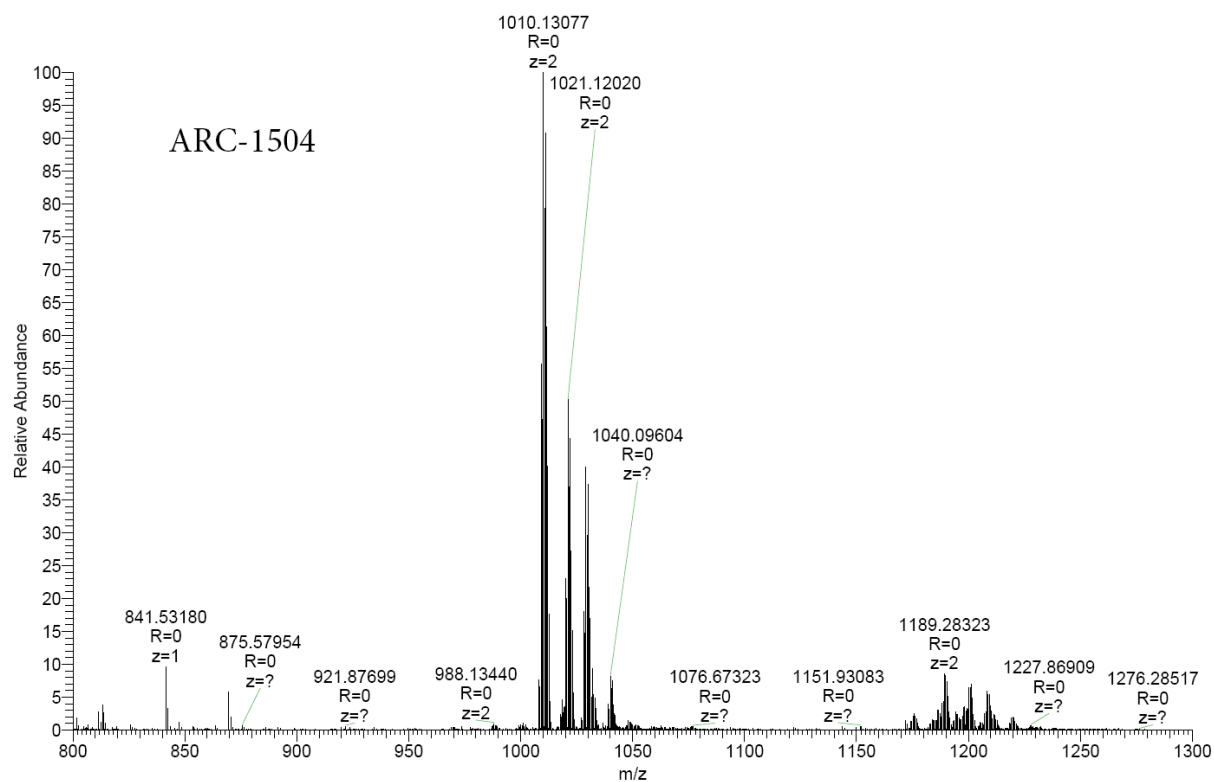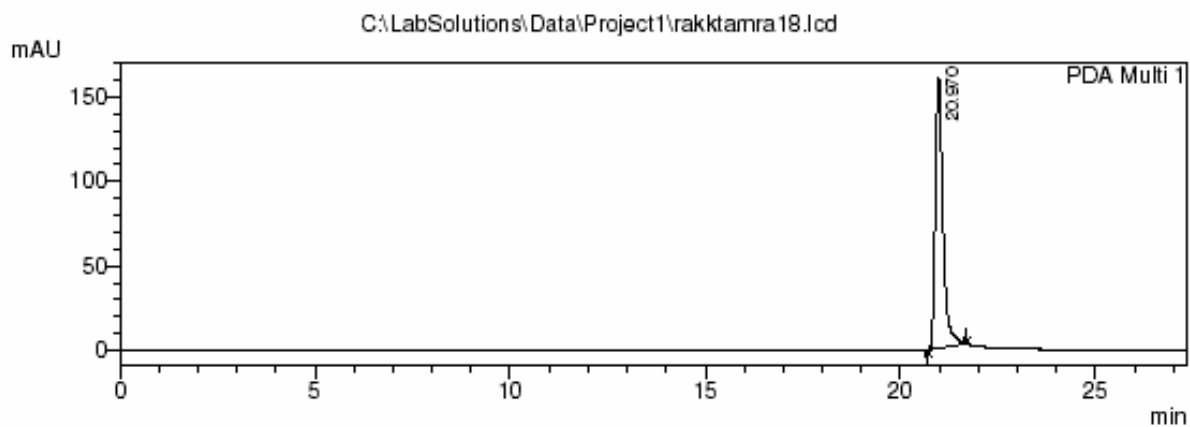

1 PDA Multi 1/640nm 4nm

PeakTable

PDA Ch1 640nm 4nm

| Peak# | Ret. Time | Area    | Height | Area %  | Height % |
|-------|-----------|---------|--------|---------|----------|
| 1     | 20.970    | 2171086 | 160224 | 100.000 | 100.000  |
| Total |           | 2171086 | 160224 | 100.000 | 100.000  |



### 5-Tamra-RADDSDDDD

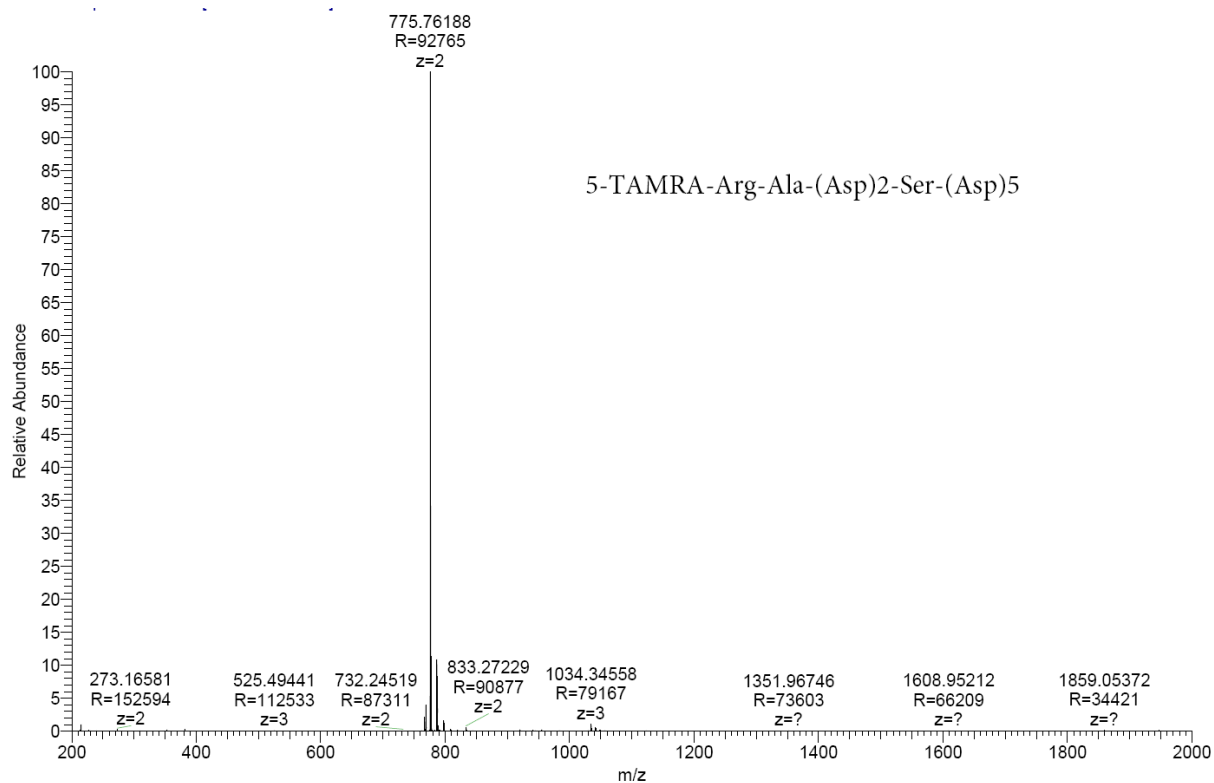

5-Tamra-RADDSDDDI  
 Gradient 10-60/30min  
 Rt 12.8 min  
 Purity 100%

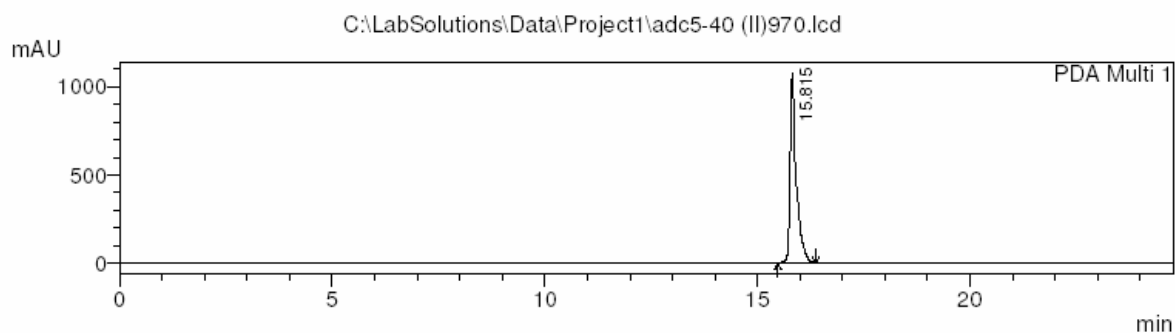

1 PDA Multi 1/550nm 4nm

PeakTable

PDA Ch1 550nm 4nm

| Peak# | Ret. Time | Area     | Height  | Area %  | Height % |
|-------|-----------|----------|---------|---------|----------|
| 1     | 15.815    | 10769154 | 1077464 | 100.000 | 100.000  |
| Total |           | 10769154 | 1077464 | 100.000 | 100.000  |

## 5-Tamra-RADDS(p)DDDDD

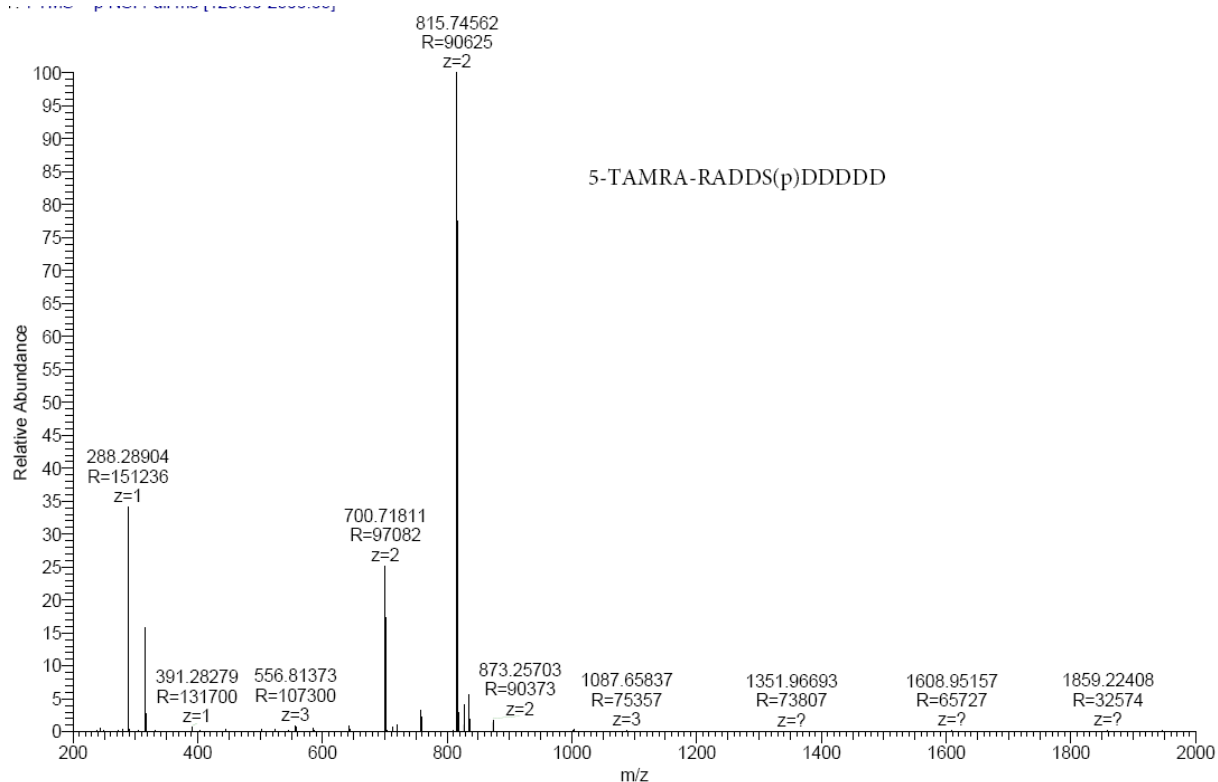

**Table S2** Residual activities of 140 kinases in the presence of **ARC-1502** (1  $\mu$ M final concentration). Kinases correspond to sequences of human origin unless specified. The selectivity panel was conducted on commercial basis by International Centre for Kinase Profiling (University of Dundee) using radiometric filter-binding assay. The ATP concentrations are at or below the calculated  $K_m$  value for that kinase except when denoted with asterisk. Residual activities are expressed as a percentage of the control without inhibitor (means of duplicate determinations).

| kinase         | Activity % at 1 $\mu$ M ARC-1502 | ATP ( $\mu$ M) |
|----------------|----------------------------------|----------------|
| CK2 $\alpha$   | 1 ( $\pm$ 0)                     | 5              |
| DYRK2          | 17 ( $\pm$ 1)                    | 50             |
| PLK1           | 18 ( $\pm$ 3)                    | 5              |
| CLK2           | 24 ( $\pm$ 2)                    | 5              |
| ERK8           | 25 ( $\pm$ 0)                    | 5              |
| DYRK3          | 30 ( $\pm$ 2)                    | 5              |
| DYRK1a         | 36 ( $\pm$ 3)                    | 50             |
| HIPK2          | 36 ( $\pm$ 1)                    | 5              |
| GSK3 $\beta$   | 46 ( $\pm$ 7)                    | 5              |
| CK1 $\delta$   | 49 ( $\pm$ 5)                    | 20             |
| TTK            | 52 ( $\pm$ 21)                   | 20             |
| IRR            | 55 ( $\pm$ 20)                   | 5              |
| IKK $\beta$    | 55 ( $\pm$ 6)                    | 5              |
| Src            | 57 ( $\pm$ 3)                    | 50             |
| NUAK1          | 58 ( $\pm$ 13)                   | 20             |
| PIM3           | 59 ( $\pm$ 3)                    | 20             |
| SRPK1          | 61 ( $\pm$ 11)                   | 50             |
| Lck (mouse)    | 62 ( $\pm$ 4)                    | 50             |
| TAK1           | 62 ( $\pm$ 3)                    | 5              |
| S6K1           | 62 ( $\pm$ 10)                   | 20             |
| PIM1           | 62 ( $\pm$ 10)                   | 20             |
| CDK2-Cyclin A2 | 64 ( $\pm$ 2)                    | 20             |
| CDK9-Cyclin T1 | 65 ( $\pm$ 19)                   | 50             |
| MARK2          | 66 ( $\pm$ 3)                    | 20             |
| JAK2           | 66 ( $\pm$ 3)                    | 5              |
| MKK2           | 66 ( $\pm$ 0)                    | 5              |
| HIPK1          | 68 ( $\pm$ 9)                    | 20             |
| AMPK (rat)     | 69 ( $\pm$ 1)                    | 50             |
| MAPKAP-K3      | 69 ( $\pm$ 20)                   | 20             |
| IR             | 70 ( $\pm$ 7)                    | 20             |
| RSK2           | 70 ( $\pm$ 1)                    | 50             |
| CK1 $\gamma$ 2 | 71 ( $\pm$ 5)                    | 20             |

|                 |                |     |
|-----------------|----------------|-----|
| PAK4            | 71 ( $\pm$ 3)  | 5   |
| eIF2AK3         | 71 ( $\pm$ 1)  | 5   |
| PKB $\beta$     | 72 ( $\pm$ 5)  | 50  |
| PKD1            | 72 ( $\pm$ 7)  | 50  |
| MARK3           | 73 ( $\pm$ 11) | 5   |
| PKB $\alpha$    | 73 ( $\pm$ 22) | 5   |
| SIK2            | 74 ( $\pm$ 7)  | 50  |
| PRAK            | 74 ( $\pm$ 5)  | 20  |
| SIK3            | 74 ( $\pm$ 3)  | 50  |
| HIPK3           | 75 ( $\pm$ 0)  | 20  |
| MARK4           | 75 ( $\pm$ 8)  | 50  |
| BRSK2           | 75 ( $\pm$ 4)  | 50  |
| VEGFR1          | 76 ( $\pm$ 4)  | 20  |
| AMPK            | 76 ( $\pm$ 2)  | 20  |
| PDGFRA          | 77 ( $\pm$ 4)  | 5   |
| EPH-A2          | 80 ( $\pm$ 5)  | 50  |
| EF2K            | 80 ( $\pm$ 8)  | 5   |
| BTK             | 80 ( $\pm$ 4)  | 50  |
| PAK5            | 81 ( $\pm$ 10) | 20  |
| TESK1           | 81 ( $\pm$ 4)  | 50  |
| MKK6            | 82 ( $\pm$ 2)  | 50* |
| MARK1           | 83 ( $\pm$ 6)  | 20  |
| DAPK1           | 84 ( $\pm$ 11) | 5   |
| IKK $\epsilon$  | 84 ( $\pm$ 7)  | 50  |
| TAO1            | 84 ( $\pm$ 8)  | 20  |
| JNK3 $\alpha$ 1 | 85 ( $\pm$ 11) | 20  |
| PDK1            | 86 ( $\pm$ 20) | 20  |
| TSSK1           | 86 ( $\pm$ 11) | 20  |
| PAK6            | 86 ( $\pm$ 11) | 20  |
| MAP4K3          | 86 ( $\pm$ 17) | 20  |
| WNK1            | 88 ( $\pm$ 1)  | 20  |
| RSK1            | 88 ( $\pm$ 0)  | 50  |
| MNK2 $\alpha$   | 89 ( $\pm$ 22) | 50  |
| MAPKAP-K2       | 89 ( $\pm$ 11) | 20  |

|              |           |     |
|--------------|-----------|-----|
| IRAK1        | 89 (±2)   | 5   |
| MLK3         | 89 (±3)   | 20  |
| TTBK1        | 90 (±2)   | 5   |
| ROCK 2 (rat) | 91 (±5)   | 20  |
| CaMKKβ       | 91 (±6)   | 20  |
| MELK         | 92 (±1)   | 50  |
| CSK          | 92 (±5)   | 20  |
| ERK2         | 92 (±6)   | 20  |
| PRK2         | 92 (±4)   | 5   |
| PIM2         | 92 (±0)   | 5   |
| TBK1         | 93 (±9)   | 50  |
| p38δ MAPK    | 93 (±6)   | 5   |
| NEK2A        | 94 (±7)   | 50  |
| PKCα         | 94 (±10)  | 20  |
| MEKK1        | 95 (±13)  | 50  |
| BRSK1        | 95 (±3)   | 20  |
| TTBK2        | 95 (±6)   | 5   |
| GCK          | 95 (±13)  | 20  |
| smMLCK       | 96 (±1)   | 50  |
| MPSK1        | 96 (±2)   | 50* |
| STK33        | 96 (±4)   | 50* |
| LKB1         | 96 (±15)  | 20  |
| p38γ MAPK    | 97 (±10)  | 5   |
| ZAP70        | 97 (±4)   | 5   |
| EPH-B3       | 98 (±10)  | 20  |
| TGFBR1       | 98 (±4)   | 20  |
| ERK5         | 98 (±8)   | 50  |
| MNK1         | 99 (±11)  | 50  |
| MST2         | 99 (±7)   | 20  |
| SYK          | 100 (±3)  | 20  |
| MST3         | 100 (±3)  | 20  |
| PKA          | 100 (±2)  | 20  |
| Aurora B     | 100 (±19) | 20  |
| MKK1         | 101 (±9)  | 5   |
| ABL1         | 101 (±26) | 5   |
| CHK2         | 101 (±6)  | 20  |
| PAK2         | 102 (±4)  | 20  |
| EPH-B1       | 102 (±11) | 20  |
| MSK1         | 102 (±8)  | 20  |

|           |           |     |
|-----------|-----------|-----|
| JNK1α1    | 103 (±8)  | 20  |
| YES1      | 103 (±21) | 20  |
| HER4      | 103 (±5)  | 5   |
| EPH-B4    | 104 (±9)  | 50  |
| PhKγ1     | 105 (±8)  | 50  |
| PKCζ      | 105 (±7)  | 5   |
| TIE2      | 105 (±13) | 20  |
| JNK2α2    | 105 (±5)  | 20  |
| CaMK1α    | 105 (±3)  | 50  |
| PKCγ      | 106 (±8)  | 20  |
| TLK1      | 107 (±3)  | 5   |
| DDR2      | 109 (±6)  | 5   |
| FGF-R1    | 110 (±7)  | 20  |
| ERK1      | 110 (±9)  | 5   |
| ULK2      | 110 (±2)  | 5   |
| TrkA      | 111 (±15) | 20  |
| ULK1      | 111 (±25) | 20  |
| MLK1      | 112 (±7)  | 20  |
| BRK       | 113 (±8)  | 20  |
| EPH-B2    | 113 (±11) | 20  |
| MST4      | 114 (±20) | 20  |
| ASK1      | 114 (±34) | 50* |
| p38α MAPK | 116 (±11) | 50  |
| IGF-1R    | 116 (±16) | 5   |
| EPH-A4    | 117 (±5)  | 50  |
| IRAK4     | 118 (±16) | 20  |
| Aurora A  | 118 (±0)  | 5   |
| RIPK2     | 120 (±3)  | 20  |
| NEK6      | 121 (±9)  | 50  |
| p38β MAPK | 122 (±1)  | 20  |
| SGK1      | 127 (±0)  | 20  |
| OSR1      | 130 (±50) | 5   |
| MAP4K5    | 132 (±14) | 20  |
| CHK1      | 134 (±14) | 20  |
| MINK1     | 139 (±18) | 50  |

**Table S3** X-ray diffraction data and refinement statistics of the CK2 $\alpha$ <sup>1-335</sup>/ ARC-1154 co-crystal structure (4FBX)

| Diffraction data                          |                                         |
|-------------------------------------------|-----------------------------------------|
| Space group                               | P4 <sub>3</sub> 2 <sub>1</sub> 2        |
| Cell dimensions [Å]                       | 72.114, 72.114, 135.056                 |
| Resolution [Å]                            | 32.25 – 2.33 (2.46 – 2.33) <sup>#</sup> |
| Unique reflections                        | 15925                                   |
| R <sub>sym</sub> [%]                      | 9.5 (64.0) <sup>#</sup>                 |
| I/ $\sigma$ I (last shell)                | 18.8 (2.0) <sup>#</sup>                 |
| Completeness [%]                          | 99.9 (99.8) <sup>#</sup>                |
| Redundancy                                | 8.0 (4.0) <sup>#</sup>                  |
| Wilson B-factor [Å <sup>2</sup> ]         | 38.8                                    |
| Structure refinement and validation       |                                         |
| Resolution [Å]                            | 31.81 – 2.33                            |
| No. of refl. in working set/test set      | 14944 / 924                             |
| R <sub>work</sub> / R <sub>free</sub> [%] | 19.9 / 24.9                             |
| Composition of asymm. unit                |                                         |
| protomers                                 | 1                                       |
| missing (disordered) res                  | Met1, Gly335                            |
| ATP-site ligands                          | 1 ARC-1154 molecule                     |
| further ligands                           | 5 chloride ions                         |
| water molecules                           | 122                                     |
| Ramachandran plot quality <sup>###</sup>  |                                         |
| favoured                                  | 295 (97.3%)                             |
| allowed                                   | 7 (2.1%)                                |
| outliers                                  | 1 (0.6%)                                |
| R.m.s. deviations                         |                                         |
| bond lengths [Å]                          | 0.003                                   |
| bond angles [deg]                         | 0.677                                   |

<sup>#</sup>Values in brackets refer to the highest res. shell

<sup>###</sup>according to MolProbity<sup>1</sup> embedded in PHENIX<sup>2</sup>

**References:**

- 1 V.B. Chen, W.B. Arendall 3rd, J.J. Headd, D.A. Keedy, R.M. Immormino, G.J. Kapral, L.W. Murray, J.S. Richardson and D.C. Richardson, *Acta Crystallogr D Biol. Crystallogr.*, 2010, **66**, 12–21.
- 2 P.D. Adams, P.V. Afonine, G. Bunkoczi, V.B. Chen, I.W. Davis, N. Echols, J.J. Headd, L.W. Hung, G.J. Kapral, R.W. Grosse-Kunstleve, A.J. McCoy, N.W. Moriarty, R. Oeffner, R.J. Read, D.C. Richardson, J.S. Richardson, T.C. Terwilliger and P.H. Zwart, *Acta Crystallogr.*, 2010, D66, 213–221.

## UV-spectrum of 8-(4,5,6,7-tetrabromo-1H-benzimidazol-1-yl)octanoic acid.

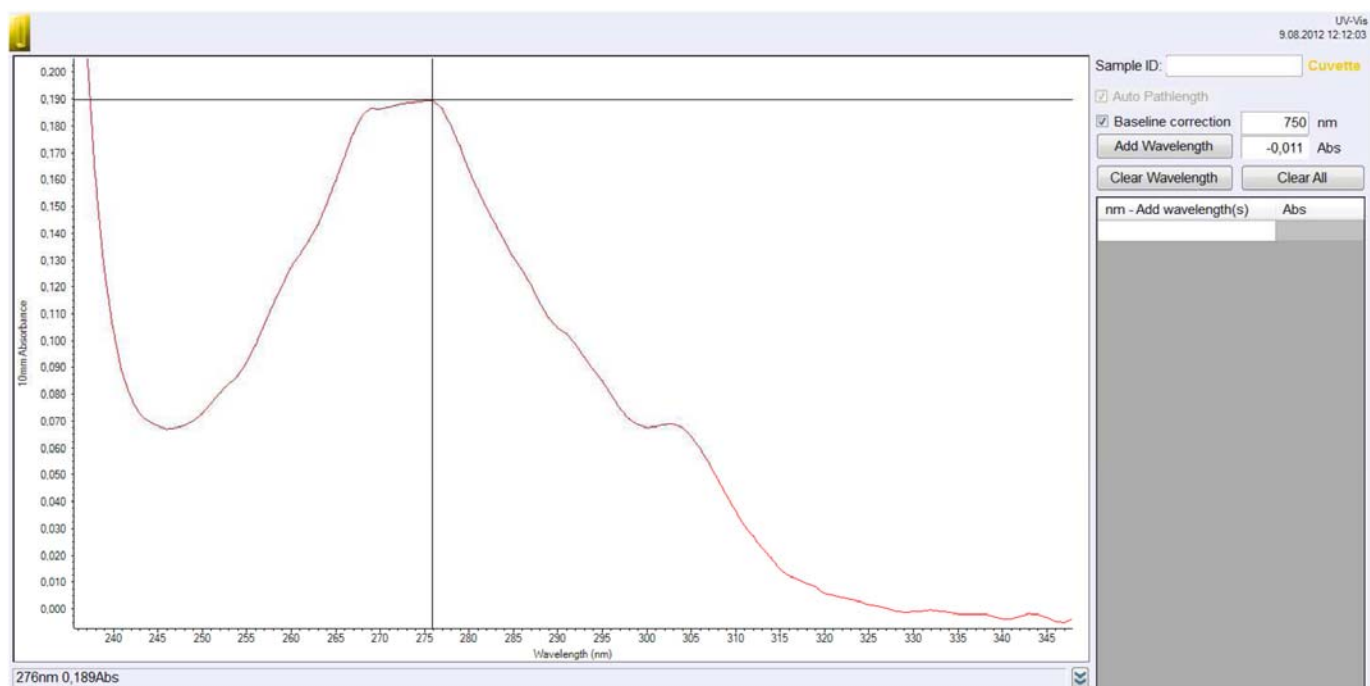

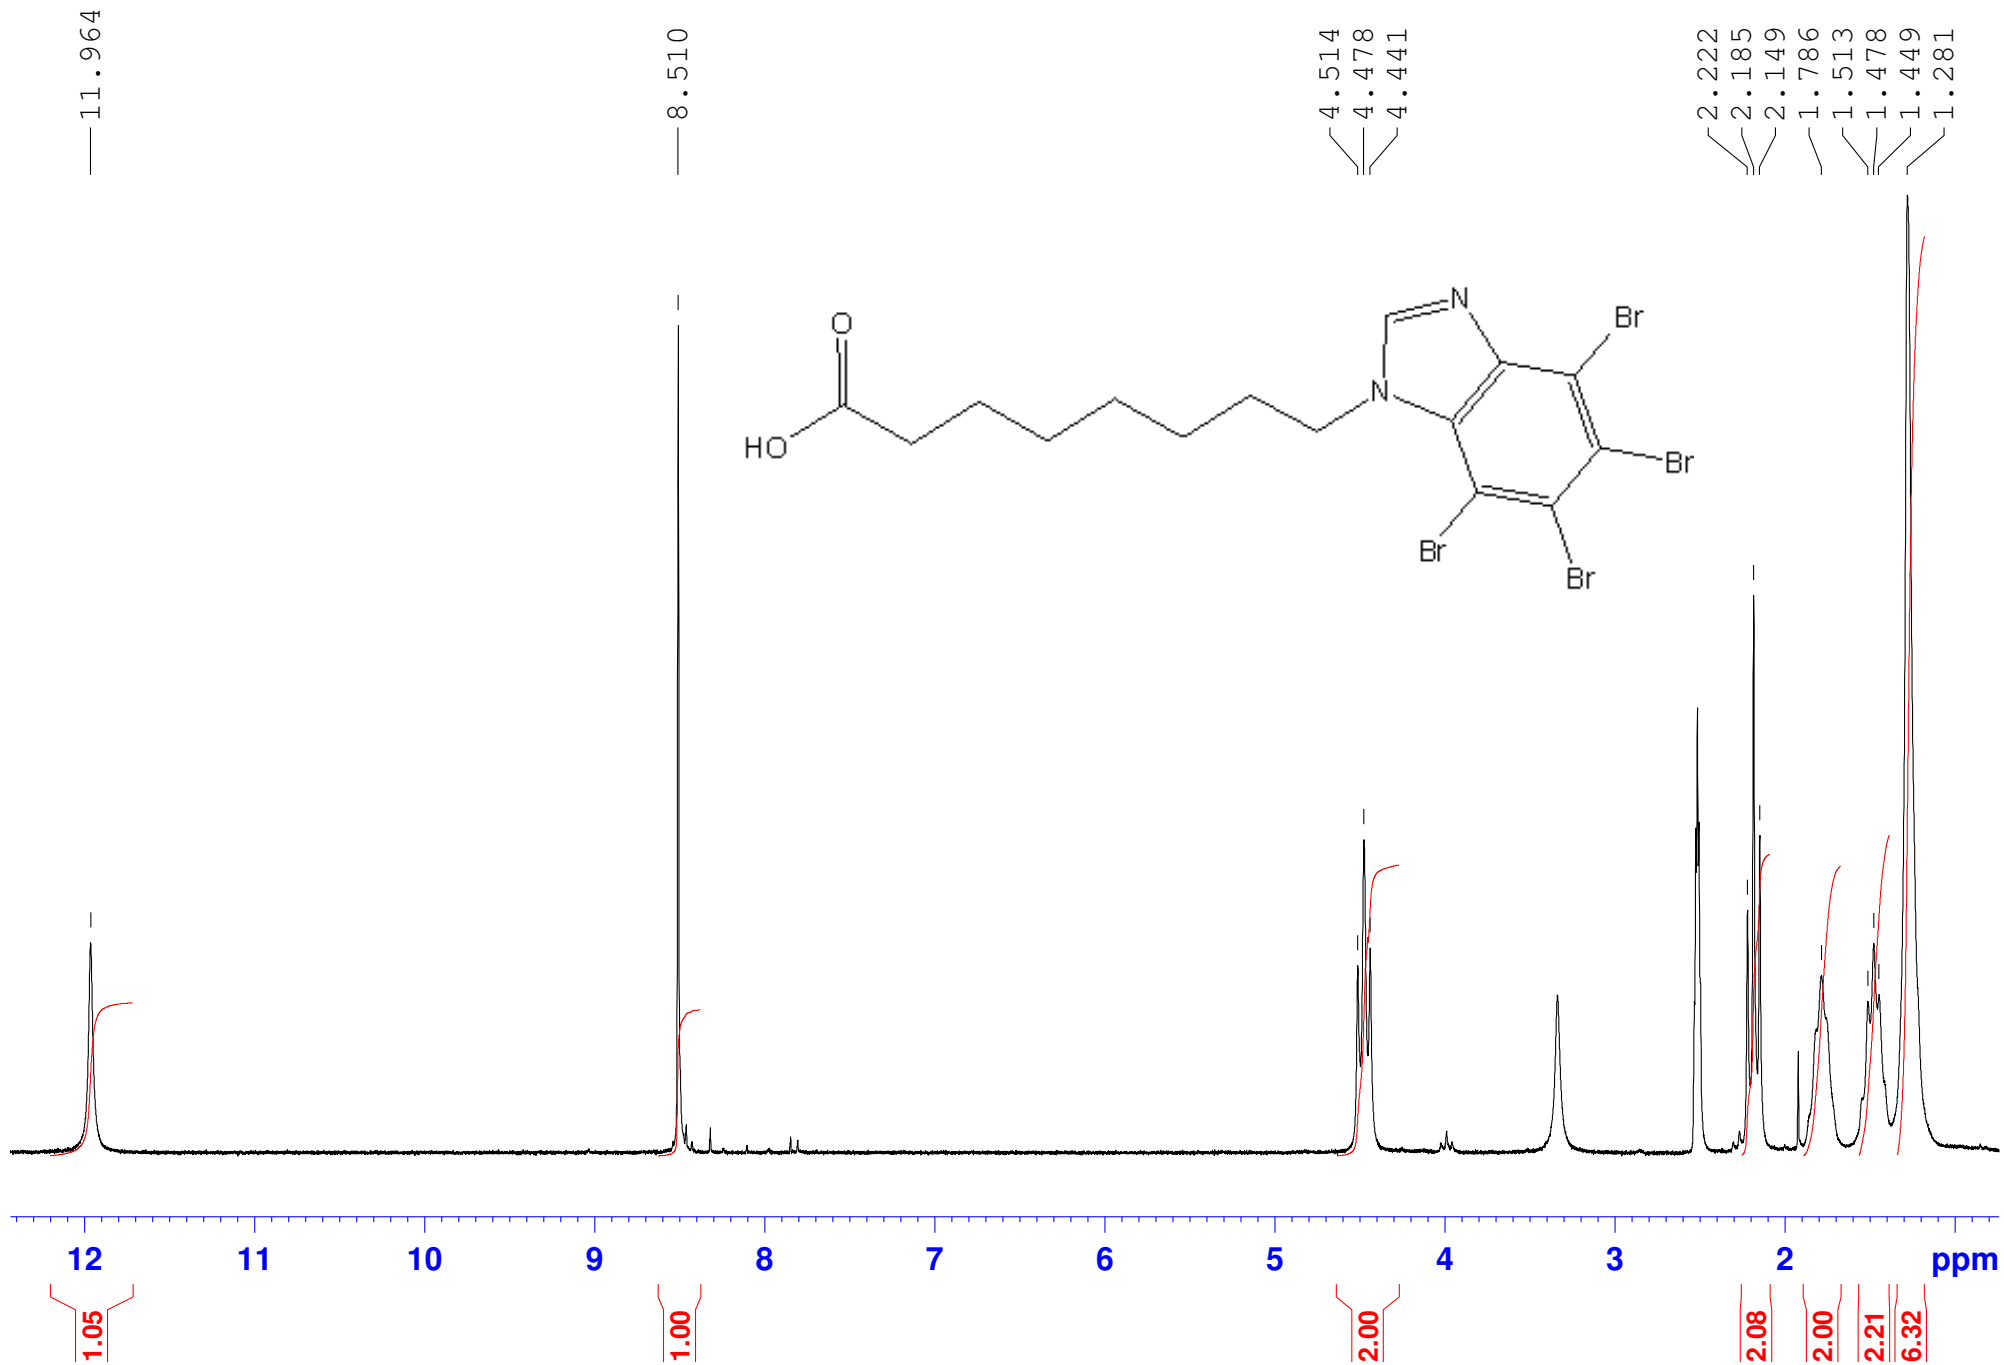

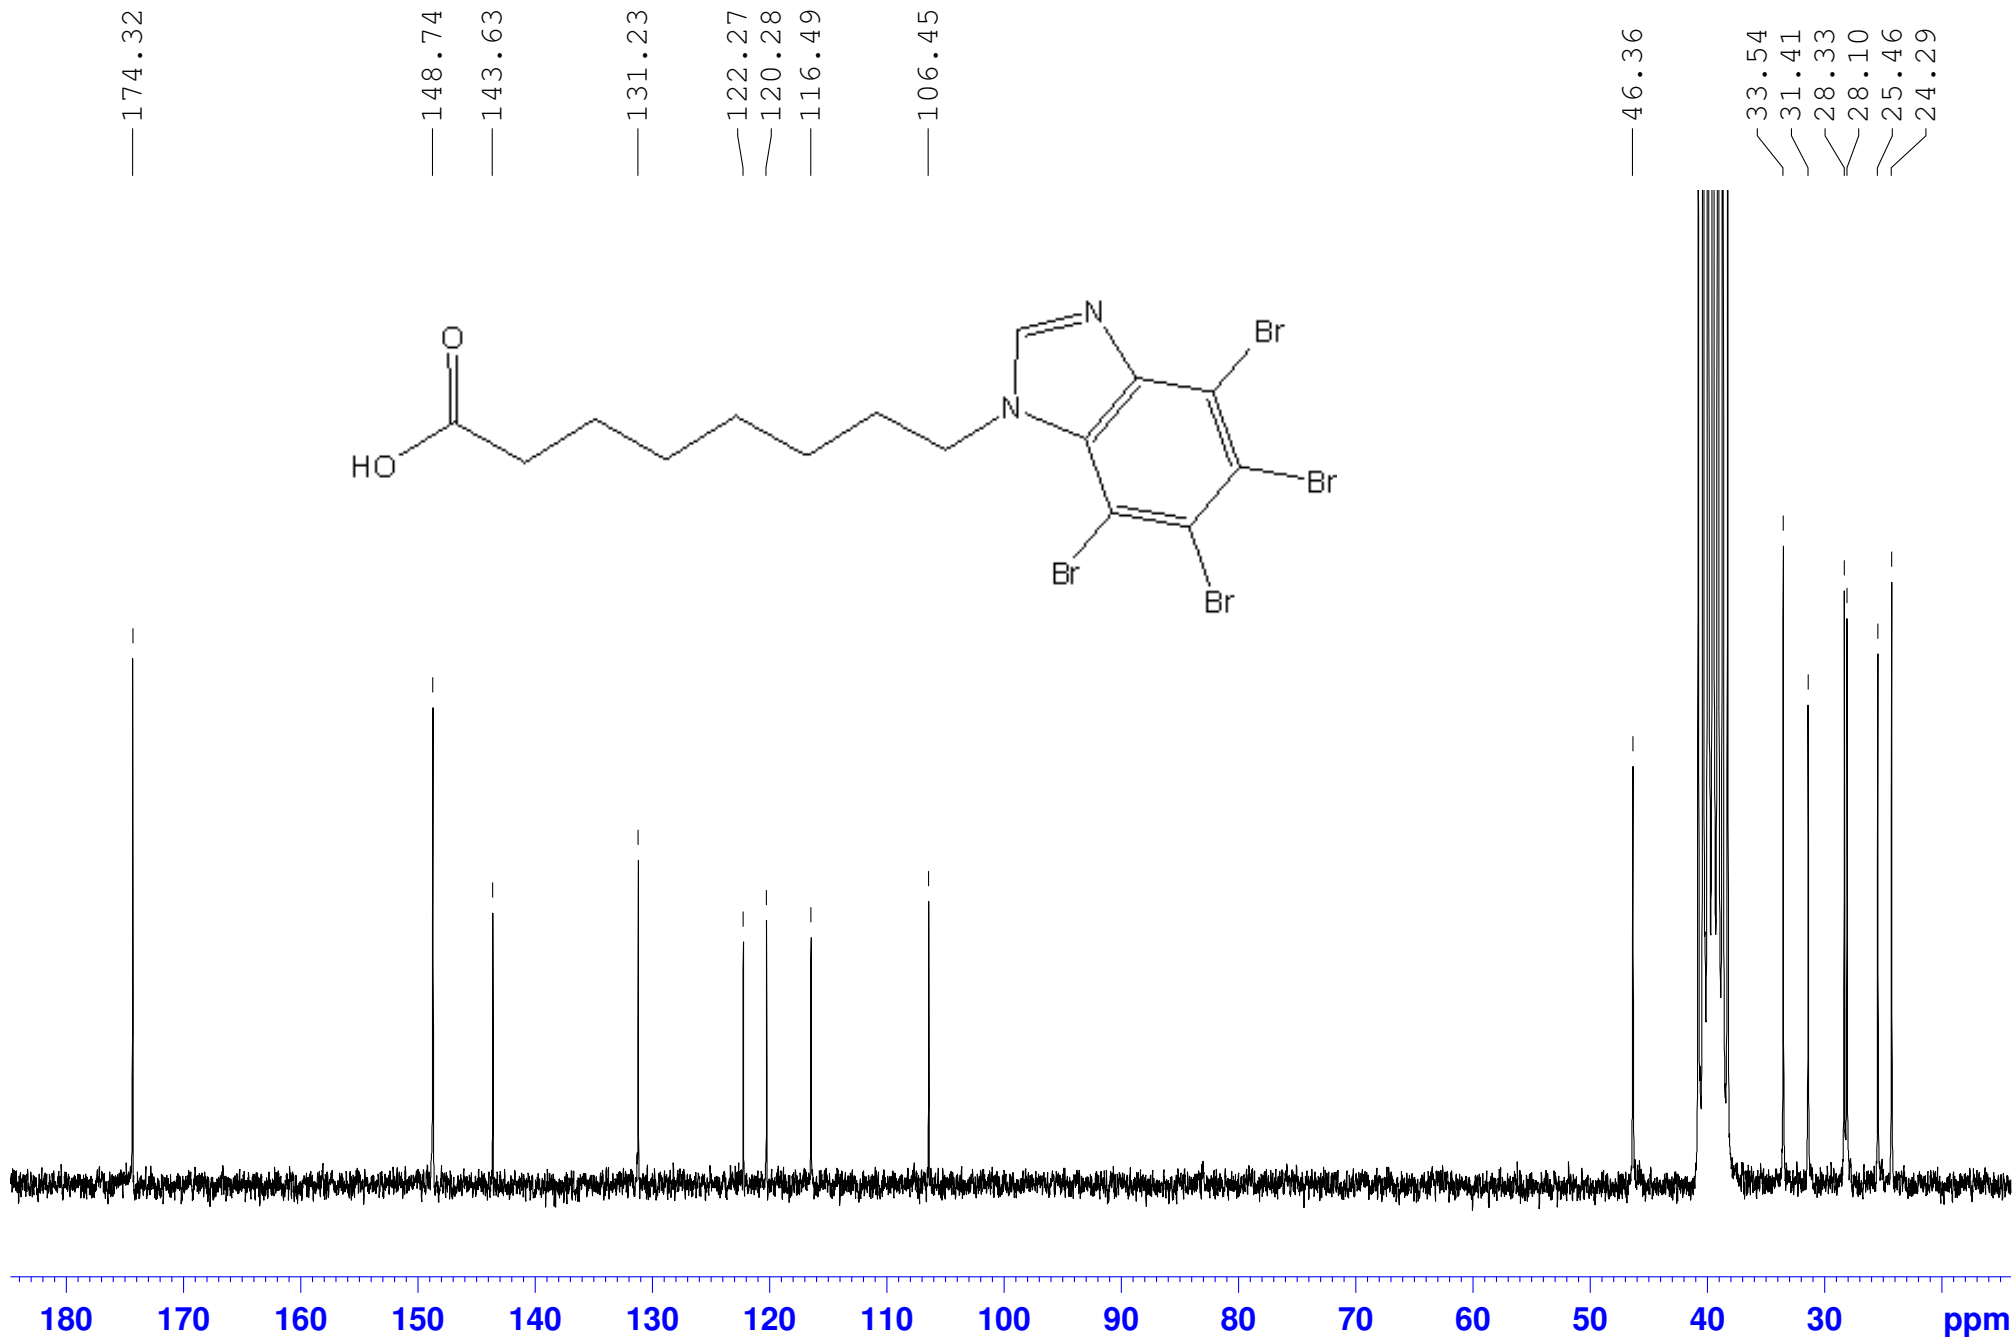

Supplement: c2ob26022k.pdf [file c2ob26022k.pdf]
